# Supplementary material
Source: PubMed Central journal article supplement (PMC5485922)
Supplement: NIHMS862480-supplement-1.pdf [file NIHMS862480-supplement-1.pdf]

**Supplemental Figure 1.** Randomization Schema for Trial \*\*\*\*

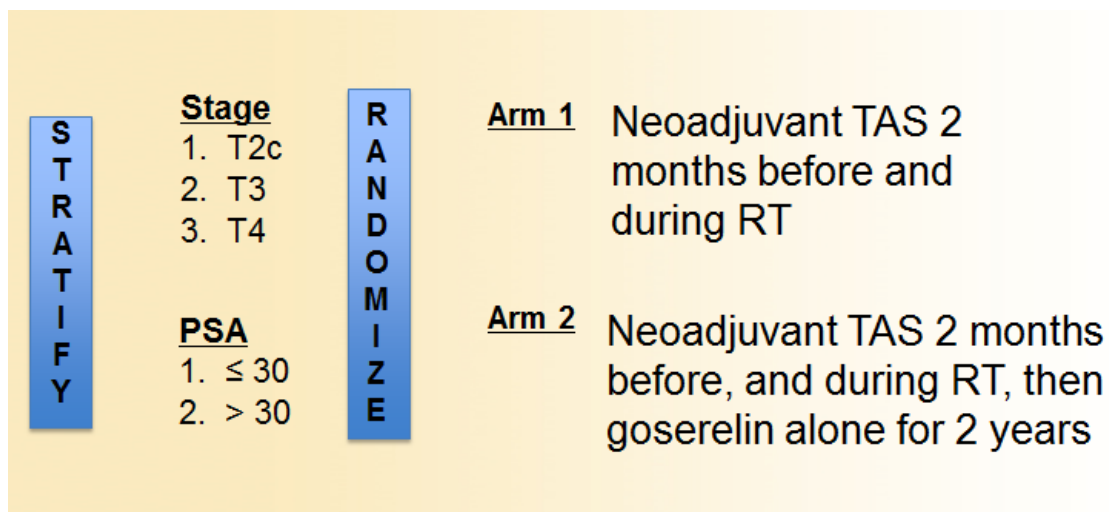

Total Androgen Suppression (TAS): Flutamide 250 mg tid and goserelin 3.6 mg monthly
